## **Erratum: A novel cancer immunotherapy based on the combination of a synthetic carbohydrate-pulsed dendritic cell vaccine and glycoengineered cancer cells**

**Lei Qiu, Jie Li, Shichong Yu, Qianli Wang, Yinghua Li, Zhenlin Hu, Qiuye Wu, Zhongwu Guo, Junping Zhang**

*Oncotarget*. 2015; 6:5195-5203

PMID: 25760071

Present:

### **FINANCIAL SUPPORT**

This work was supported by the National Natural Science Foundation of China (No.30728032, 21202200).

Correct:

### **FINANCIAL SUPPORT**

This work was supported by the National Natural Science Foundation of China (No.30728032, 21202200) and **R01 CA095142/CA/NCI NIH HHS/United States**.
